# Supplementary material
Source: HighWire-hosted journal article supplement (https://jnm.snmjournals.org/highwire/filestream/95464/field_highwire_adjunct_files/0/219097_Supplemental_Data.pdf)
Supplement: 219097_Supplemental_Data.pdf [file 219097_Supplemental_Data.pdf]

**Supplemental Figure 1**

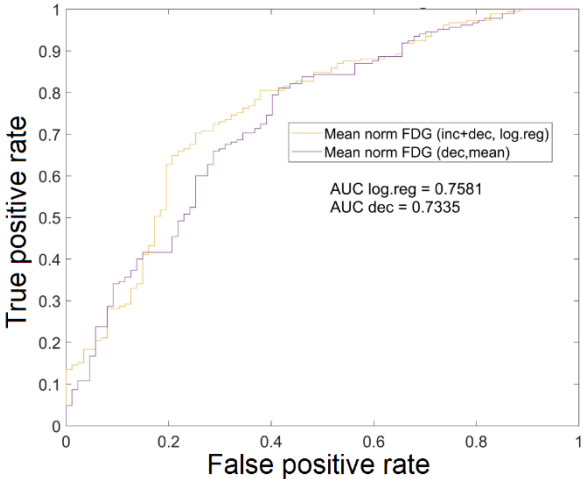

| Variable                      | N     | Hazard ratio      | p      |
|-------------------------------|-------|-------------------|--------|
| PES                           | 272   | 2.09 (1.54, 2.82) | <0.001 |
| MMSE                          | 272   | 1.45 (1.16, 1.80) | <0.001 |
| APOE                          | 0 138 | Reference         |        |
|                               | 1 134 | 1.42 (0.90, 2.25) | 0.13   |
| n. <sup>18</sup> F-FDG uptake | 272   | 1.35 (1.01, 1.80) | 0.04   |
| Sex                           | 0 100 | Reference         |        |
|                               | 1 172 | 1.17 (0.73, 1.88) | 0.51   |
| FAQ                           | 272   | 1.10 (1.06, 1.15) | <0.001 |
| Age                           | 272   | 1.00 (0.97, 1.03) | 0.86   |

**Supplemental Table 1.** Characteristics of the Cox regression models (SPM).

| Model                 | Predictor        | Hazard ratio | P-value               | AIC                  | Harrell's C<br>Training<br>dataset | Harrell's C<br>Test dataset |
|-----------------------|------------------|--------------|-----------------------|----------------------|------------------------------------|-----------------------------|
| <b>Imaging model</b>  |                  |              |                       | 788.7 <sup>b,c</sup> | 0.76                               | 0.73                        |
|                       | Norm. FDG uptake | 2.89         | $2 \times 10^{-16}$   |                      |                                    |                             |
|                       | Age              | 1.06         | 0.57                  |                      |                                    |                             |
|                       | Sex              | 1.08         | 0.73                  |                      |                                    |                             |
| <b>Clinical model</b> |                  |              |                       | 797.2 <sup>a,c</sup> | 0.80                               | 0.77                        |
|                       | Age              | 1.00         | 0.95                  |                      |                                    |                             |
|                       | Sex              | 1.18         | 0.48                  |                      |                                    |                             |
|                       | FAQ              | 1.66         | $2.0 \times 10^{-10}$ |                      |                                    |                             |
|                       | APOE             | 1.85         | 0.007                 |                      |                                    |                             |
|                       | MMSE             | 1.54         | $3.5 \times 10^{-5}$  |                      |                                    |                             |
| <b>Combined model</b> |                  |              |                       | 751.6 <sup>a,b</sup> | 0.84                               | 0.81                        |
|                       | Norm. FDG uptake | 2.44         | $7.5 \times 10^{-12}$ |                      |                                    |                             |
|                       | Age              | 1.04         | 0.68                  |                      |                                    |                             |
|                       | Sex              | 1.16         | 0.52                  |                      |                                    |                             |
|                       | FAQ              | 1.63         | $1.2 \times 10^{-8}$  |                      |                                    |                             |
|                       | APOE             | 1.61         | 0.03                  |                      |                                    |                             |
|                       | MMSE             | 1.37         | 0.002                 |                      |                                    |                             |

All continuous variables are z-transformed. Significance level: <sup>a</sup>  $p = 5 \times 10^{-12}$ , <sup>b</sup>  $p = 2 \times 10^{-9}$ , <sup>c</sup>  $p = 0.1$ . FDG uptake stems from the linear combination of hypo- and hypermetabolic VOIs. AIC, Akaike information criterion.
